# Supplementary material
Source: Royal Society of Chemistry journal article supplement (doi:10.1039/d6ta03714c)
Supplement: d6ta03714c1.pdf [file d6ta03714c1.pdf]

1

## Supporting information

2

### 3 **Breaking the stability-activity trade-off in single-atom catalysis via interlayer electric** 4 **fields in van der Waals heterostructure**

5 Khayankhyarvaa Narmandakh, Suseong Hyun, Haeshik Lee, Byungchan Han<sup>1\*</sup>

6 <sup>1</sup>Department of Chemical and Biomolecular Engineering, Yonsei University, Seoul 03722,  
7 Republic of Korea

8

9 \*Corresponding author: [bchan@yonsei.ac.kr](mailto:bchan@yonsei.ac.kr)

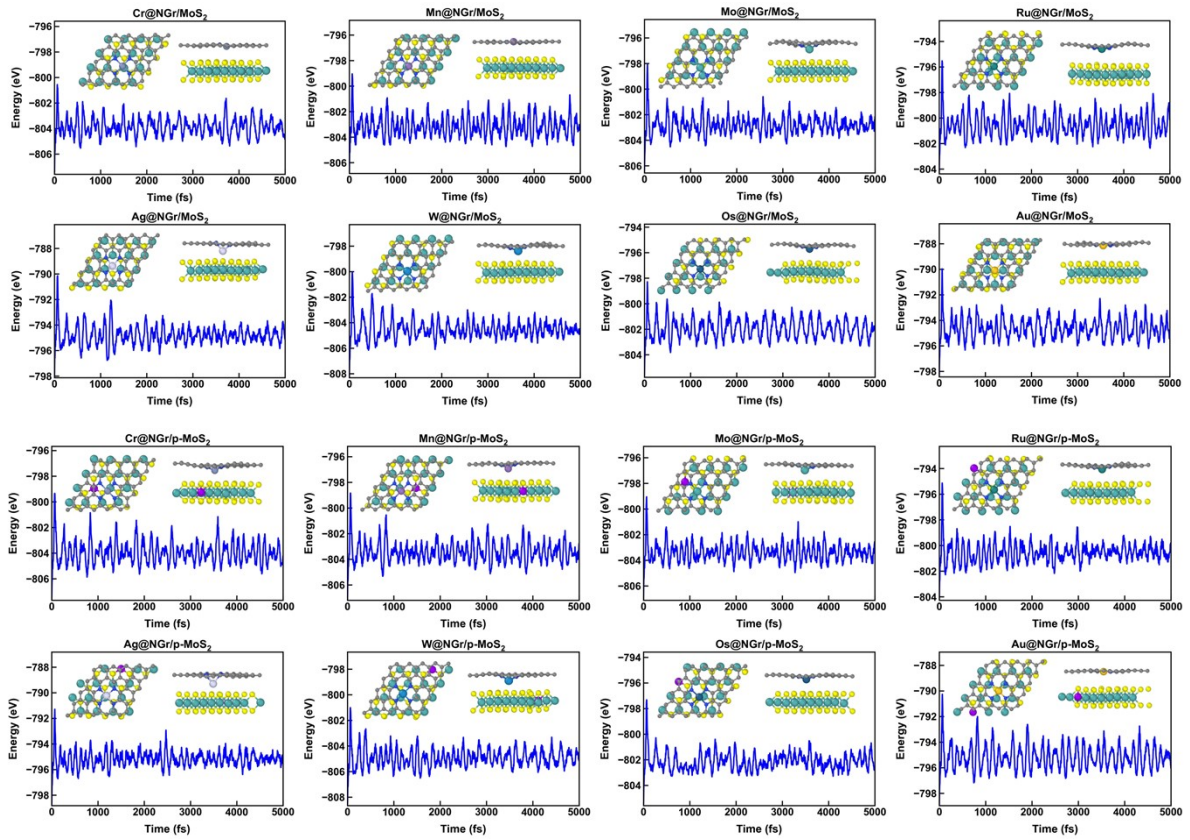

1

2

3 **Figure S1.** The AIMD simulation results for  $M@NGr/MoS_2$  and  $M@NGr/p-MoS_2$  structures.  
 4 The inset displays the final structure after 5 ps. During the simulation,  $M@NGr$  and TMD  
 5 layers moved in  $x$  and  $y$  directions, which is a normal phenomenon considering that the two  
 6 layers interact with weak dispersion forces.

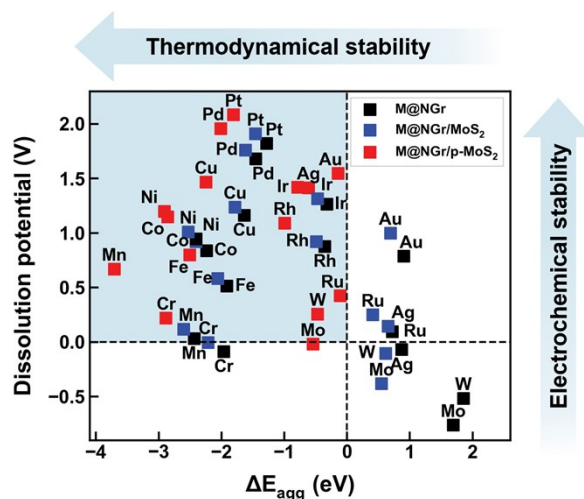

1

2 **Figure S2.** Stability map of all transition metal single atom in M@NGr, M@NGr/MoS<sub>2</sub>, and  
 3 M@NGr/p-MoS<sub>2</sub> structures illustrating resistance against aggregation and electrochemical  
 4 dissolution. The blue quadrant denotes the optimal region where the single atom is both  
 5 stable against aggregation and dissolution during HER in acidic conditions.

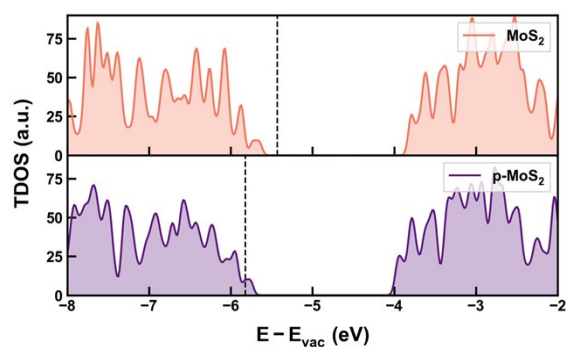

1

2 **Figure S3.** Total density of states (TDOS) of isolated monolayers of MoS<sub>2</sub> and Nb-doped p-  
 3 type MoS<sub>2</sub> (p-MoS<sub>2</sub>). The energies are referenced to the vacuum level ( $E_{\text{vac}}$ ), and the dashed  
 4 lines indicate the respective Fermi level ( $E_{\text{F}}$ ) for each system. Nb doping shifts  $E_{\text{F}}$  to lower  
 5 energy, increasing the work function of p-MoS<sub>2</sub> relative to undoped MoS<sub>2</sub> (5.82 eV vs. 5.43  
 6 eV; see Table S5) and thereby amplifying the work function mismatch with M@NGr upon  
 7 heterostructure formation.

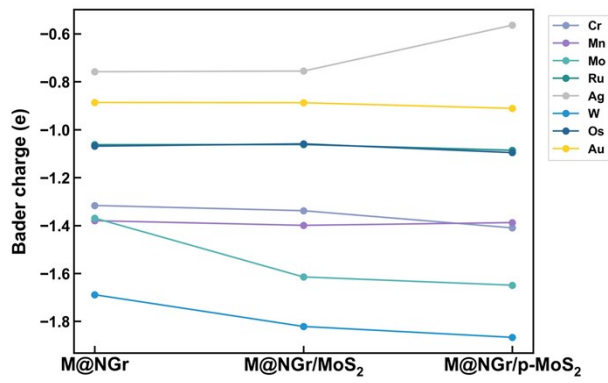

1

2 **Figure S4.** Bader charge of metal single atom in M@NGr, M@NGr/MoS<sub>2</sub>, and M@NGr/p-  
 3 MoS<sub>2</sub>. The interfacial interactions do not significantly alter the charge state of metal atoms,  
 4 suggesting that the interlayer charge transfer mainly occurs from C/N atoms in M@NGr to  
 5 TMD.

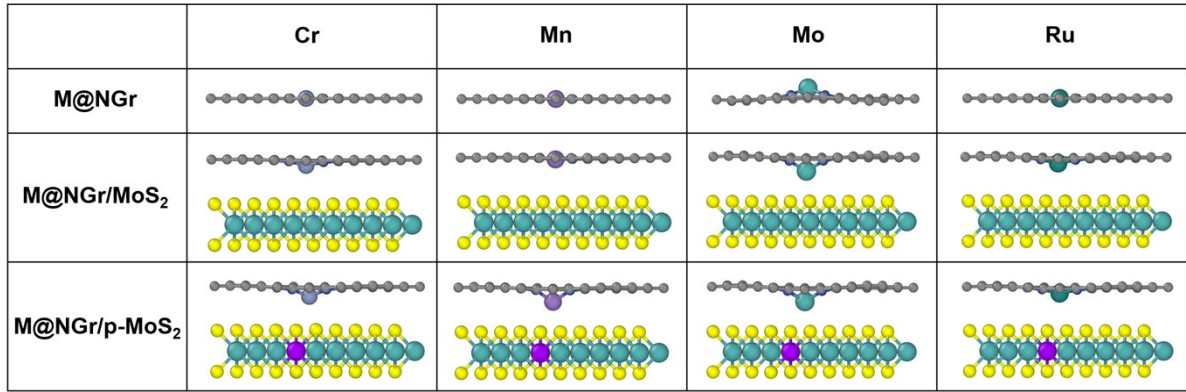

1

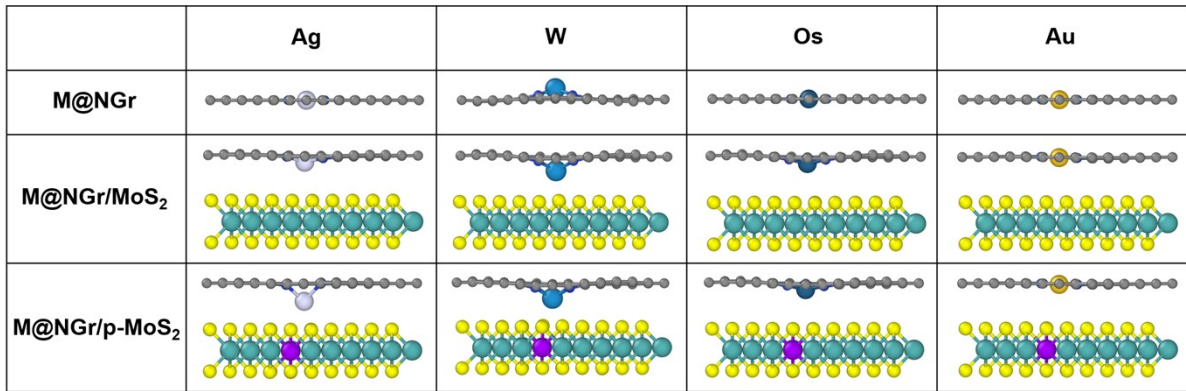

2

3 **Figure S5.** Side views of the DFT-optimized geometric structures of M@NGr, M@NGr/MoS<sub>2</sub>,  
 4 and M@NGr/p-MoS<sub>2</sub> for selected transition metals, showing the downward displacement ( $\Delta z$ )  
 5 of the single metal atom along out-of-plane direction upon heterostructure formation. The  
 6 progressive increase in  $\Delta z$  from M@NGr/MoS<sub>2</sub> to M@NGr/p-MoS<sub>2</sub> is consistent with the  
 7 stronger built-in electric field and greater electrostatic attraction toward the TMD layer in the  
 8 p-doped system. Color code: gray (C), blue (N), yellow (S), green (Mo), purple (Nb), and  
 9 element-specific color for the single metal atom.

10

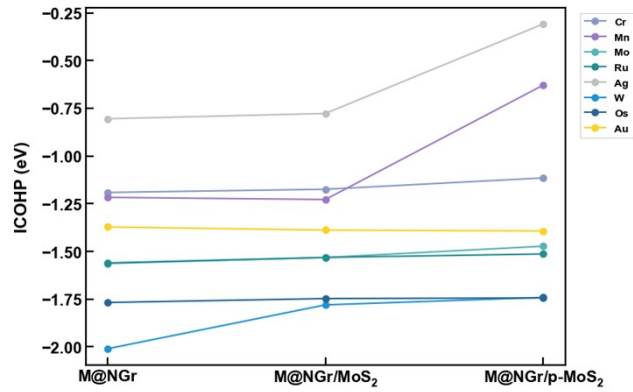

1

2 **Figure S6.** Integrated Crystal Orbital Hamilton Population (ICOHP) values for metal-N bond  
 3 in M@NGr, M@NGr/MoS<sub>2</sub>, and M@NGr/p-MoS<sub>2</sub>, quantifying metal-N bond strength. The  
 4 weakened ICOHP values are consistent with increased M-N bond lengths. For most metals, the  
 5 M-N bond strengths remains nearly unchanged, showing that the enhanced single atom stability  
 6 is not due to stronger M-N interactions but because of electrostatic attraction from interlayer  
 7 built-in electric field.

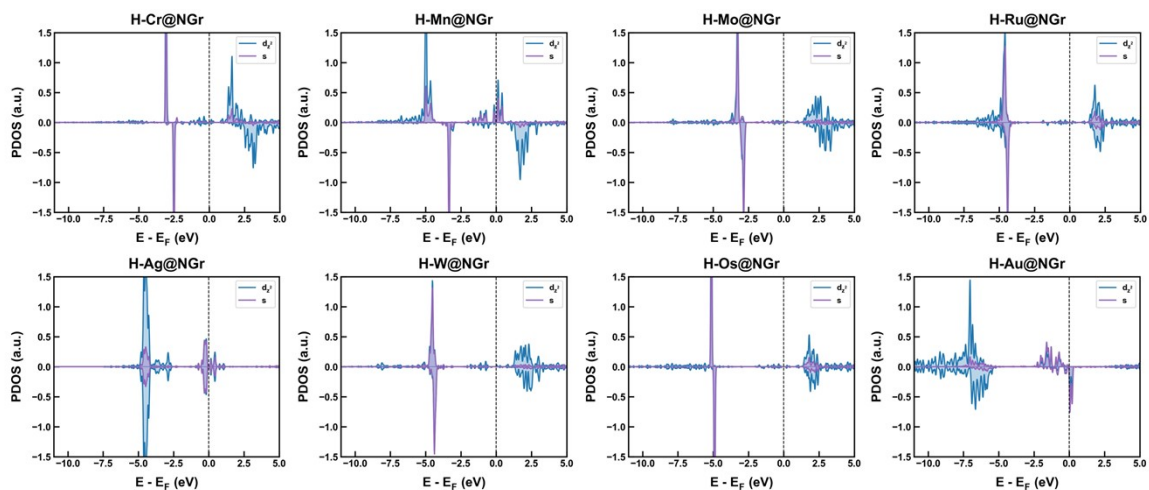

1

2 **Figure S7.** Projected density of states (PDOS) of the metal  $d_{22}$  orbital and the adsorbed H 1s  
 3 orbital in H-adsorbed M@NGr structures for all metals investigated. The energy levels of  
 4 bonding and antibonding orbitals are consistent with the projected crystal orbital Hamiltonian  
 5 populations (pCOHP) in Figure 6c.

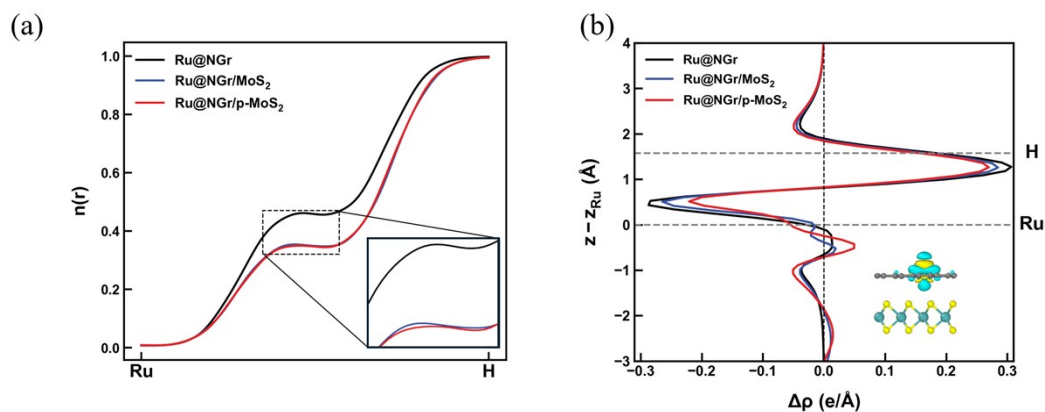

1

2 **Figure S8.** Charge redistribution and bonding character analysis of the Ru-H interaction in H-  
 3 adsorbed Ru@NGr, Ru@NGr/MoS<sub>2</sub>, and Ru@NGr/p-MoS<sub>2</sub>. (a) Electron localization function  
 4 (ELF) profiles computed along the line passing through the Ru-H bond axis, demonstrating the  
 5 progressive reduction in covalency of Ru-H bonding upon heterostructure formation. (b) Plane-  
 6 averaged and three-dimensional charge density difference ( $\Delta\rho = \rho_{\text{total}} - \rho_{\text{slab}} - \rho_{\text{H}^*}$ ) for each  
 7 system (yellow: charge accumulation; cyan: charge depletion). The progressive attenuation of  
 8 charge accumulation along the Ru-H axis from Ru@NGr to Ru@NGr/p-MoS<sub>2</sub> is consistent  
 9 with the increasing Ru  $d_{22}$  orbital delocalization induced by interlayer  $d_{22}$ - $p_z$  hybridization and  
 10 weakening of the Ru-H covalent bond.

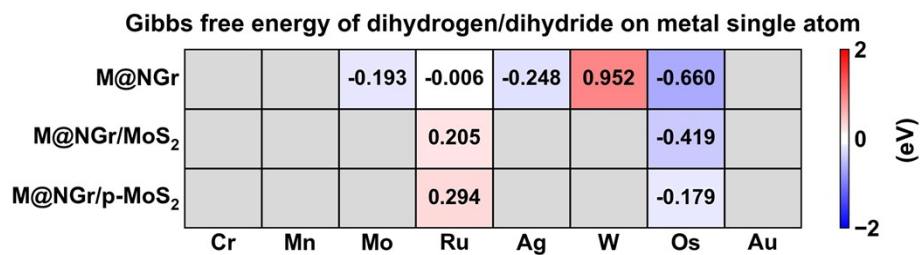

1  
2

3 **Figure S9.** Free energy of dihydrogen/dihydride on metal single atoms in M@NGr,  
4 M@NGr/MoS<sub>2</sub>, and M@NGr/p-MoS<sub>2</sub> systems. Shaded regions correspond to cases where H<sub>2</sub>  
5 was only weakly physisorbed with large metal-H distance.

1 **Table S1.** Optimized in-plane lattice parameters of graphene (Gr), and MoS<sub>2</sub> monolayers

| System                             | Lattice constant (Å) | Note                          |
|------------------------------------|----------------------|-------------------------------|
| Gr                                 | 2.467                | GGA-PBE optimized             |
| MoS <sub>2</sub> (unstrained)      | 3.162                | GGA-PBE optimized             |
| MoS <sub>2</sub> (strained -2.47%) | 3.084                | Applied to match Gr supercell |

2 (unstrained and strained).

1 **Table S2.** Aggregation energy ( $\Delta E_{agg}$ ) and single atom dissolution potential ( $U_{diss,SAC}^{n+}$ ) values  
 2 for all transition metal SACs in the M@NGr reference system used for Figure 2a, Figure 2b

| <b>M</b>  | $E_{coh}$ | $E_{emb}$ | $\Delta E_{agg}$ | $U_{diss,bulk}^{n+}$ |           |           | $U_{diss,SAC}^{n+}$ |           |           |
|-----------|-----------|-----------|------------------|----------------------|-----------|-----------|---------------------|-----------|-----------|
|           |           |           |                  | <b>1+</b>            | <b>2+</b> | <b>3+</b> | <b>1+</b>           | <b>2+</b> | <b>3+</b> |
| <b>Cr</b> | -4.150    | -6.113    | -1.963           |                      | -0.913    | -0.744    |                     | 0.068     | -0.090    |
| <b>Mn</b> | -2.920    | -5.352    | -2.432           |                      | -1.185    | -0.276    |                     | 0.031     | 0.535     |
| <b>Fe</b> | 4.320     | -6.235    | -1.915           |                      | -0.447    | -0.037    |                     | 0.511     | 0.601     |
| <b>Co</b> | 4.470     | -6.703    | -2.233           |                      | -0.280    | 0.453     |                     | 0.836     | 1.198     |
| <b>Ni</b> | 4.480     | -6.885    | -2.405           |                      | -0.257    |           |                     | 0.945     |           |
| <b>Cu</b> | 3.510     | -5.145    | -1.635           | 0.521                | 0.342     | 1.028     | 2.156               | 1.159     | 1.573     |
| <b>Mo</b> | -6.840    | -5.445    | 1.395            |                      |           | -0.200    |                     |           | -0.665    |
| <b>Ru</b> | -6.800    | -6.074    | 0.726            |                      | 0.455     | 0.386     |                     | 0.092     | 0.144     |
| <b>Rh</b> | 5.760     | -6.110    | -0.350           | 0.600                |           | 0.758     | 0.950               |           | 0.875     |
| <b>Pd</b> | 3.930     | -5.383    | -1.453           |                      | 0.951     |           |                     | 1.678     |           |
| <b>Ag</b> | -2.960    | -2.089    | 0.871            | 0.800                | 1.390     | 1.527     | -0.071              | 0.955     | 1.236     |
| <b>W</b>  | -8.830    | -6.975    | 1.855            |                      |           | 0.100     |                     |           | -0.518    |
| <b>Os</b> | -8.220    | -7.271    | 0.949            |                      |           |           |                     |           |           |
| <b>Ir</b> | 6.960     | -7.277    | -0.317           |                      |           | 1.156     |                     |           | 1.262     |
| <b>Pt</b> | 5.870     | -7.148    | -1.278           |                      | 1.180     |           |                     | 1.819     |           |
| <b>Au</b> | -3.830    | -2.924    | 0.906            | 1.692                | 1.746     | 1.498     | 0.786               | 1.293     | 1.196     |

3 and Figure S2.

1 **Table S3.** Aggregation energy ( $\Delta E_{agg}$ ) and single atom dissolution potential ( $U_{diss,SAC}^{n+}$ ) values

| <b>M</b>  | $E_{coh}$ | $E_{emb}$ | $\Delta E_{agg}$ | $U_{diss,bulk}^{n+}$ |           |           | $U_{diss,SAC}^{n+}$ |           |           |
|-----------|-----------|-----------|------------------|----------------------|-----------|-----------|---------------------|-----------|-----------|
|           |           |           |                  | <b>1+</b>            | <b>2+</b> | <b>3+</b> | <b>1+</b>           | <b>2+</b> | <b>3+</b> |
| <b>Cr</b> | -4.150    | -6.360    | -2.210           |                      | -0.913    | -0.744    |                     | 0.192     | -0.007    |
| <b>Mn</b> | -2.920    | -5.521    | -2.601           |                      | -1.185    | -0.276    |                     | 0.115     | 0.591     |
| <b>Fe</b> | 4.320     | -6.376    | -2.056           |                      | -0.447    | -0.037    |                     | 0.581     | 0.648     |
| <b>Co</b> | 4.470     | -6.871    | -2.401           |                      | -0.280    | 0.453     |                     | 0.920     | 1.254     |
| <b>Ni</b> | 4.480     | -7.008    | -2.528           |                      | -0.257    |           |                     | 1.007     |           |
| <b>Cu</b> | 3.510     | -5.294    | -1.784           | 0.521                | 0.342     | 1.028     | 2.305               | 1.234     | 1.623     |
| <b>Mo</b> | -6.840    | -6.290    | 0.550            |                      |           | -0.200    |                     |           | -0.383    |
| <b>Ru</b> | -6.800    | -6.386    | 0.414            |                      | 0.455     | 0.386     |                     | 0.248     | 0.248     |
| <b>Rh</b> | 5.760     | -6.247    | -0.487           | 0.600                |           | 0.758     | 1.087               |           | 0.920     |
| <b>Pd</b> | 3.930     | -5.543    | -1.613           |                      | 0.951     |           |                     | 1.758     |           |
| <b>Ag</b> | -2.960    | -2.303    | 0.657            | 0.800                | 1.390     | 1.527     | 0.142               | 1.061     | 1.307     |
| <b>W</b>  | -8.830    | -8.214    | 0.616            |                      |           | 0.100     |                     |           | -0.105    |
| <b>Os</b> | -8.220    | -7.581    | 0.639            |                      |           |           |                     |           |           |
| <b>Ir</b> | 6.960     | -7.427    | -0.467           |                      |           | 1.156     |                     |           | 1.312     |
| <b>Pt</b> | 5.870     | -7.325    | -1.455           |                      | 1.180     |           |                     | 1.908     |           |
| <b>Au</b> | -3.830    | -3.135    | 0.695            | 1.692                | 1.746     | 1.498     | 0.997               | 1.399     | 1.266     |

2 for all transition metal SACs in M@NGr/MoS<sub>2</sub> structure used for Figure 2b and Figure S2.

1 **Table S4.** Aggregation energy ( $\Delta E_{agg}$ ) and single atom dissolution potential ( $U_{diss,SAC}^{n+}$ ) values

| <b>M</b>  | $E_{coh}$ | $E_{emb}$ | $\Delta E_{agg}$ | $U_{diss,bulk}^{n+}$ |           |           | $U_{diss,SAC}^{n+}$ |           |           |
|-----------|-----------|-----------|------------------|----------------------|-----------|-----------|---------------------|-----------|-----------|
|           |           |           |                  | <b>1+</b>            | <b>2+</b> | <b>3+</b> | <b>1+</b>           | <b>2+</b> | <b>3+</b> |
| <b>Cr</b> | -4.150    | -7.032    | -2.882           |                      | -0.913    | -0.744    |                     | 0.528     | 0.217     |
| <b>Mn</b> | -2.920    | -6.623    | -3.703           |                      | -1.185    | -0.276    |                     | 0.666     | 0.958     |
| <b>Fe</b> | 4.320     | -6.822    | -2.502           |                      | -0.447    | -0.037    |                     | 0.804     | 0.797     |
| <b>Co</b> | 4.470     | -7.325    | -2.855           |                      | -0.280    | 0.453     |                     | 1.147     | 1.405     |
| <b>Ni</b> | 4.480     | -7.388    | -2.908           |                      | -0.257    |           |                     | 1.197     |           |
| <b>Cu</b> | 3.510     | -5.756    | -2.246           | 0.521                | 0.342     | 1.028     | 2.767               | 1.465     | 1.777     |
| <b>Mo</b> | -6.840    | -7.379    | -0.539           |                      |           | -0.200    |                     |           | -0.020    |
| <b>Ru</b> | -6.800    | -6.908    | -0.108           |                      | 0.455     | 0.386     |                     | 0.509     | 0.422     |
| <b>Rh</b> | 5.760     | -6.749    | -0.989           | 0.600                |           | 0.758     | 1.589               |           | 1.088     |
| <b>Pd</b> | 3.930     | -5.940    | -2.010           |                      | 0.951     |           |                     | 1.956     |           |
| <b>Ag</b> | -2.960    | -3.573    | -0.613           | 0.800                | 1.390     | 1.527     | 1.413               | 1.696     | 1.731     |
| <b>W</b>  | -8.830    | -9.296    | -0.466           |                      |           | 0.100     |                     |           | 0.255     |
| <b>Os</b> | -8.220    | -8.045    | 0.175            |                      |           |           |                     |           |           |
| <b>Ir</b> | 6.960     | -7.743    | -0.783           |                      |           | 1.156     |                     |           | 1.417     |
| <b>Pt</b> | 5.870     | -7.676    | -1.806           |                      | 1.180     |           |                     | 2.083     |           |
| <b>Au</b> | -3.830    | -3.969    | -0.139           | 1.692                | 1.746     | 1.498     | 1.831               | 1.816     | 1.544     |

2 for all transition metal SACs in M@NGr/p-MoS<sub>2</sub> structure used for Figure 2b and Figure S2.

1 **Table S5.** Calculated work functions of isolated MoS<sub>2</sub>, p-MoS<sub>2</sub>, and M@NGr monolayers for  
2 selected transition metals. Work functions were computed from the plane-averaged  
3 electrostatic potential using DFT-D3-corrected GGA-PBE+U functional. The consistently  
4 lower work functions of all M@NGr systems relative to MoS<sub>2</sub> and p-MoS<sub>2</sub> confirm that  
5 electrons flow from M@NGr to the TMD layer upon heterostructure contact for all metals  
6 investigated.

| <b>System</b>      | <b>Work function (eV)</b> |
|--------------------|---------------------------|
| MoS <sub>2</sub>   | 5.43                      |
| p-MoS <sub>2</sub> | 5.82                      |
| Cr@NGr             | 3.80                      |
| Mn@NGr             | 3.83                      |
| Mo@NGr             | 3.85                      |
| Ru@NGr             | 3.81                      |
| Ag@NGr             | 3.78                      |
| W@NGr              | 3.76                      |
| Os@NGr             | 4.03                      |
| Au@NGr             | 3.58                      |

1 **Table S6.** Calculated magnetic moments ( $\mu_B$ ) of the single-atom metal center in M@NGr,  
2 M@NGr/MoS<sub>2</sub>, and M@NGr/p-MoS<sub>2</sub>. For Mn, heterostructure formation induces a low-spin  
3 to high-spin transition in M@NGr/p-MoS<sub>2</sub>, driven by reduced crystal field splitting upon out-  
4 of-plane metal displacement. For Ag, the magnetic moment vanishes in M@NGr/p-MoS<sub>2</sub>,  
5 indicating complete stabilization of the d<sup>10</sup> closed-shell configuration upon Ag-N bond  
6 elongation. These element-specific spin-state responses provide supplementary stabilization

| <b>M</b>  | <b>M@NGr</b><br><b>(<math>\mu_B</math>)</b> | <b>M@NGr/MoS<sub>2</sub></b><br><b>(<math>\mu_B</math>)</b> | <b>M@NGr/p-MoS<sub>2</sub></b><br><b>(<math>\mu_B</math>)</b> | <b>Spin state transition</b> |
|-----------|---------------------------------------------|-------------------------------------------------------------|---------------------------------------------------------------|------------------------------|
| <b>Cr</b> | 3.575                                       | 3.545                                                       | 3.453                                                         | —                            |
| <b>Mn</b> | 3.262                                       | 3.293                                                       | 4.441                                                         | Low spin→High-spin           |
| <b>Mo</b> | 2.925                                       | 2.166                                                       | 2.295                                                         | —                            |
| <b>Ru</b> | 1.645                                       | 1.597                                                       | 1.623                                                         | —                            |
| <b>Ag</b> | 0.441                                       | 0.413                                                       | 0.000                                                         | High spin→Low-spin           |
| <b>W</b>  | 1.816                                       | 1.478                                                       | 1.598                                                         | —                            |
| <b>Os</b> | 1.928                                       | 1.771                                                       | 1.814                                                         | —                            |
| <b>Au</b> | 0.000                                       | 0.000                                                       | 0.000                                                         | —                            |

7 contributions beyond the general electrostatic mechanism.

1 **Table S7.** Average interlayer separation between the M@NGr layer and the top S plane of the  
2 TMD support, and the shortest M-S distance after structural relaxation. The interlayer  
3 separation is defined as the average height difference between the atoms in the M@NGr layer  
4 and the upper S atoms of the MoS<sub>2</sub> or p-MoS<sub>2</sub> layer. Underlined values denote M-S distances  
5 shorter than the sum of the corresponding covalent radii, indicating possible interfacial  
6 chemical bonding rather than purely vdW interaction.

| <b>M</b>  | <b>Interlayer distance (Å)</b> |                                | <b>M-S distance (Å)</b>      |                                |
|-----------|--------------------------------|--------------------------------|------------------------------|--------------------------------|
|           | <b>M@NGr/MoS<sub>2</sub></b>   | <b>M@NGr/p-MoS<sub>2</sub></b> | <b>M@NGr/MoS<sub>2</sub></b> | <b>M@NGr/p-MoS<sub>2</sub></b> |
| <b>Cr</b> | 3.38                           | 3.35                           | 3.12                         | 2.71                           |
| <b>Mn</b> | 3.40                           | 3.38                           | 3.42                         | 2.52                           |
| <b>Fe</b> | 3.40                           | 3.41                           | 3.45                         | 3.36                           |
| <b>Co</b> | 3.40                           | 3.41                           | 3.47                         | 3.42                           |
| <b>Ni</b> | 3.41                           | 3.42                           | 3.51                         | 3.50                           |
| <b>Cu</b> | 3.41                           | 3.41                           | 3.47                         | 3.41                           |
| <b>Mo</b> | 3.49                           | 3.49                           | <u>2.41</u>                  | <u>2.46</u>                    |
| <b>Ru</b> | 3.42                           | 3.42                           | 3.14                         | 3.12                           |
| <b>Rh</b> | 3.41                           | 3.39                           | 3.48                         | 3.25                           |
| <b>Pd</b> | 3.41                           | 3.43                           | 3.51                         | 3.52                           |
| <b>Ag</b> | 3.40                           | 3.49                           | 3.08                         | <u>2.38</u>                    |
| <b>W</b>  | 3.45                           | 3.29                           | <u>2.35</u>                  | <u>2.55</u>                    |
| <b>Os</b> | 3.48                           | 3.45                           | 3.16                         | 3.16                           |
| <b>Ir</b> | 3.41                           | 3.43                           | 3.52                         | 3.55                           |
| <b>Pt</b> | 3.41                           | 3.43                           | 3.52                         | 3.55                           |
| <b>Au</b> | 3.41                           | 3.41                           | 3.52                         | 3.48                           |
